# Supplementary figures and images for: Dishevelled Has Anti-Viral Activity in Rift Valley Fever Virus Infected Aedes aegypti
Source: MDPI journal article supplement (doi:10.3390/v15112140), 2023-10-24

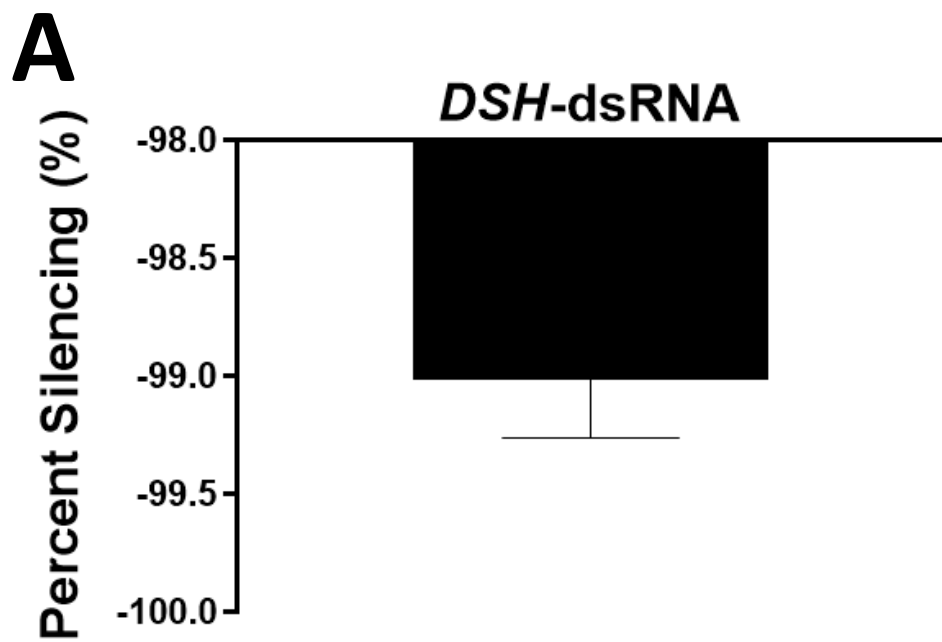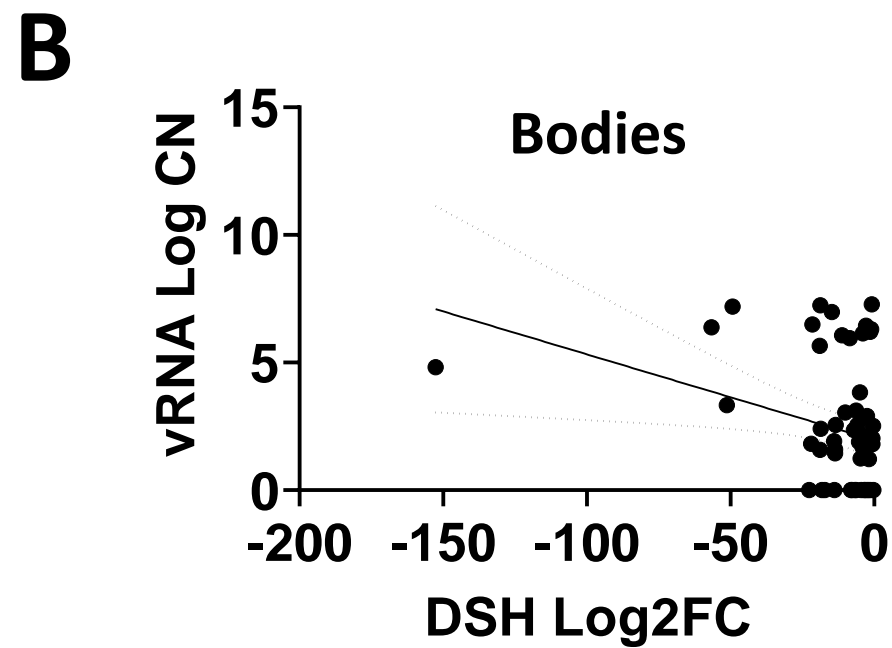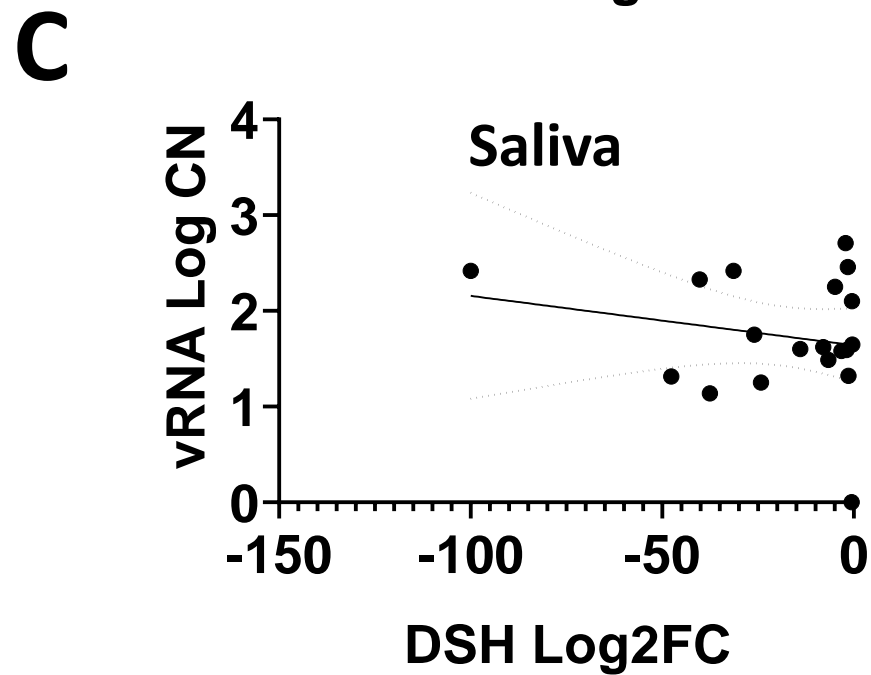

Supplement: s1 [file s1]
